# Supplementary material for: A retrospective study on nested PCR detection of syphilis treponemes in clinical samples: PCR detection contributes to the diagnosis of syphilis in patients with seronegative and serodiscrepant results
Source: PubMed Central journal article supplement (PMC7446855; doi:10.1371/journal.pone.0237949), 2020-08-20
Supplement: pone.0237949.s001.pdf [file pone.0237949.s001.pdf]

**S1 Table**  
**A. List of primers**

| Locus                       | External primers (5-3) | Length of PCR product | Internal primers (5-3)    | Length of PCR product |
|-----------------------------|------------------------|-----------------------|---------------------------|-----------------------|
| <b>TP0136</b>               | AACCCGTTAGCGCCCAACAT   | 1789 bp               | AGTGTCTTCCTCGTCCGTTT      | 1206 bp               |
|                             | TCCCAGCTCAGCCGAATCTC   |                       | CACGTGGTGGTGTCAAACCTT     |                       |
| <b>TP0548</b>               | TGGGGCACTAAACCGGAAGA   | 1567 bp               | GCGGTCCCTATGATATCGTGT     | 1065 bp               |
|                             | TACGGGCATTTGCGGATAGG   |                       | GAGCCACTTCAGCCCTACTG      |                       |
| <b>TP0705</b>               | GGTCTATATGCAGCCCTTCTTC | 1181 bp               | TGCGGCTTATCCTGATGAATAG    | 803 bp                |
|                             | GCTTGAGAACGATACCGGATAC |                       | TATTCTGCGGCGTTGGATAG      |                       |
| <b>23S rDNA<sup>1</sup></b> | CGAAGGGAAGCAGGTGTAGT   | 1666 and 1658 bp      | GTACCGCAAACCGACACAG       | 629 bp                |
|                             | GCGCGAACACCTCTTTTTTAC  |                       | AGTCAAACCGCCCACCTAC       |                       |
|                             | GAACCGTCCCTGAAAACCTCA  |                       |                           |                       |
| <b>TP0319</b>               | CTGCTCATCGGCTGCTCTA    | 733 bp                | GAAGGTGGTGACTTCGTCGT      | 451 bp                |
|                             | ACCACAGACTTCGACCCATC   |                       | CAAAACCCGCTTCAAAGAGA      |                       |
| <b>TP0105</b>               | TTCTGTGCTCACGTCTGGTC   | 637 bp                | TGCGCGTGTGCGAATGGTGTGGTC  | 376 bp                |
|                             | TGCAACCATCGTATCGAAAA   |                       | CACAGTGCTCAAAAACGCCTGCACG |                       |

<sup>1</sup>Both copies of 23S rDNA gene were amplified

**B. First step reaction with 1 µl of DNA**

| Compound                                   | Volume (µl) | Final volume |
|--------------------------------------------|-------------|--------------|
| water                                      | 16.3        | 25 µl        |
| 2.5 mM deoxynucleotide triphosphate (dNTP) | 2           |              |
| 5x PS GXL buffer                           | 5           |              |
| Primer F (100 pmol/µl)                     | 0.095       |              |
| Primer R (100 pmol/µl)                     | 0.095       |              |
| DNA**                                      | 1           |              |
| PrimeSTAR GXL polymerase*                  | 0.5         |              |

\*Takara, BioEurope, France

\*\* DNA of TPA strain Nichols (5 µg/µl) was used as a positive control; distilled water was used as a negative control.

| Phase | Step               | Temperature | Time       | No. of cycles |
|-------|--------------------|-------------|------------|---------------|
| 1     | First denaturation | 94 °C       | 1 min      | 1             |
| 2     | Denaturation       | 98 °C       | 10 s       | 8             |
|       | Annealing          | 68 °C*      | 15 s       |               |
|       | Extension          | 68 °C       | 1 min 45 s |               |
| 3     | Denaturation       | 98 °C       | 10 s       | 35            |
|       | Annealing          | 61 °C       | 15 s       |               |
|       | Extensaion         | 68 °C       | 1 min 45 s |               |
| 4     | Final extension    | 68 °C       | 7 min      | 1             |

\*-1.0 °C per cycle

**C. First step reaction with 10 µl of DNA**

| Compound                  | Volume (µl) | Final volume |
|---------------------------|-------------|--------------|
| water                     | 11.5        | 25 µl        |
| 10 mM dNTP mixture        | 0.5         |              |
| ThermoPol Reaction buffer | 2.5         |              |
| Primer F (100 pmol/µl)    | 0.25        |              |
| Primer R (100 pmol/µl)    | 0.25        |              |
| DNA**                     | 10          |              |
| Taq polymerase*           | 0.1         |              |

\*5,000 U/ml; New England BioLabs, Ipswich, MA

\*\* DNA of TPA strain Nichols (5 µg/µl) was used as a positive control; distilled water was used as a negative control.

| Phase | Step               | Temperature | Time       | No. of cycles |
|-------|--------------------|-------------|------------|---------------|
| 1     | First denaturation | 94 °C       | 1 min      | 1             |
| 2     | Denaturation       | 94 °C       | 20 s       | 8             |
|       | Annealing          | 55 °C*      | 20 s       |               |
|       | Extension          | 72 °C       | 1 min 45 s |               |
| 3     | Denaturation       | 94 °C       | 20 s       | 35            |
|       | Annealing          | 48 °C       | 20 s       |               |
|       | Extension          | 72 °C       | 1 min 45 s |               |
| 4     | Final extension    | 72 °C       | 7 min      | 1             |

\* -1.0 °C per cycle

Note: Conditions of PCR amplification of TP0319 and TP0105: 94 °C (1 min); 94 °C (30 s), 58 °C (30 s), 72 °C (1 min) for 30 cycles; and 72 °C (10 min).

**D. Second step reaction**

| Compound                    | Volume (µl) | Final volume |
|-----------------------------|-------------|--------------|
| water                       | 20.5        | 25 µl        |
| 10 mM dNTP mixture          | 0.5         |              |
| ThermoPol Reaction buffer   | 2.5         |              |
| Primer F (100 pmol/µl)      | 0.25        |              |
| Primer R (100 pmol/µl)      | 0.25        |              |
| PCR product from first step | 1           |              |
| Taq polymerase*             | 0.1         |              |

\*5,000 U/ml; New England BioLabs, Ipswich, MA

| <b>Phase</b> | <b>Step</b>        | <b>Temperature</b> | <b>Time</b> | <b>No. of cycles</b> |
|--------------|--------------------|--------------------|-------------|----------------------|
| 1            | First denaturation | 94 °C              | 1 min       | 1                    |
| 2            | Denaturation       | 94 °C              | 30 s        | 40                   |
|              | Annealing          | 48 °C              | 30 s        |                      |
|              | Extension          | 72 °C              | 1 min 15 s  |                      |
| 3            | Final extension    | 72 °C              | 7 min       | 1                    |

Note: Conditions for TP0319 and TP0105: 94 °C (1 min); 94 °C (30 s), 58 °C (30 s), 72 °C (1 min) for 40 cycles; and 72 °C (10 min).
