# Supplementary material for: A retrospective study on nested PCR detection of syphilis treponemes in clinical samples: PCR detection contributes to the diagnosis of syphilis in patients with seronegative and serodiscrepant results
Source: PubMed Central journal article supplement (PMC7446855; doi:10.1371/journal.pone.0237949), 2020-08-20
Supplement: pone.0237949.s002.pdf [file pone.0237949.s002.pdf]

**S2 Table. Basic characteristics of patients with seropositive and serodiscrepant samples**

| Clinical characteristics |               | Swab samples (n = 411)                  |                                       | Whole-blood samples (n = 404)               |                                                  |                                              |                |
|--------------------------|---------------|-----------------------------------------|---------------------------------------|---------------------------------------------|--------------------------------------------------|----------------------------------------------|----------------|
|                          |               | PCR positive<br>(314; 257 SP,<br>57 SD) | PCR negative<br>(97; 72 SP, 25<br>SD) | PCR positive<br>(132; 112 SP,<br>20 SD)     | PCR negative<br>(272; 210 SP, 62<br>SD)          |                                              |                |
| <b>Mean age</b>          | All           | All                                     | 35.7 (0 – 71)                         | 34.7 (16 – 71)                              | 35.4 (0 – 71)                                    | 36.6. (16 – 77)                              |                |
|                          |               | Men                                     | SP                                    | 36 (0 – 71)                                 | 35.1 (16 – 71)                                   | 35.9 (0 – 71)                                | 36.3 (16 – 67) |
|                          |               |                                         | SD                                    | 34.4 (17 – 61)                              | 33.2 (23 – 46)                                   | 32.5 (18 – 43)                               | 37.5 (20 – 77) |
|                          | Women         | All                                     | 27.5 (0 – 53)                         | 32 (18 – 61)                                | 31.3. (20 – 56)                                  | 31.9 (0 – 73)                                |                |
|                          |               | SP                                      | 27.1 (0 – 53)                         | 26.4 (18 – 30)                              | 30.1 (20 – 56)                                   | 29.7 (0 – 53)                                |                |
|                          |               | SD                                      | 30.4. (20 – 38)                       | 36.5. (20 – 61)                             | 51 (51)*                                         | 35.8 (21 – 73)                               |                |
| <b>Sex, n (%)</b>        | Men           | All                                     | 275 (87.6)                            | 79 (81.4)                                   | 114 (86.4)                                       | 223 (82)                                     |                |
|                          |               | SP                                      | 223 (86.8)                            | 64 (88.9)                                   | 95 (84.8)                                        | 178 (84.8)                                   |                |
|                          |               | SD                                      | 52 (91.2)                             | 15 (60)                                     | 19 (95)                                          | 45 (72. 6)                                   |                |
|                          | Women         | All                                     | 39 (12.4)                             | 18 (18.6)                                   | 18 (13.6)                                        | 48 (17.6)**                                  |                |
|                          |               | SP                                      | 34 (13.2)                             | 8 (11.1)                                    | 17 (15.2)                                        | 31 (14.8)***                                 |                |
|                          |               | SD                                      | 5 (8.8)                               | 10 (40)                                     | 1 (5)                                            | 17 (27.4)                                    |                |
| <b>Serology</b>          | TPPA/<br>TPHA | All                                     | 291 P, 6 N, 17<br>n.d.                | 80 P, 13 N,<br>4 n.d.                       | 117 P, 3 N,<br>12 n.d.                           | 252 P, 10 N, 10 n.d.                         |                |
|                          |               | SP                                      | 245 P, 5 N, 12<br>n.d.                | 67 P, 2 N, 3 n.d.                           | 112 P, 10 n.d.                                   | 202 P, 1 N. 7 n.d.                           |                |
|                          |               | SD                                      | 46 P, 1 N, 5 n.d.                     | 13 P, 11N, 1 n.d.                           | 15 P, 3 N. 2 n.d.                                | 50 P, 9 N, 3 n.d.                            |                |
|                          | RPR           | All                                     | 259 P, 55 N<br>average log: -3.26     | 72 P, 23 N,<br>2 n.d.<br>average log: -2.77 | 112 P, 18 N,<br>2 n.d.<br>average log: -<br>3.63 | 210 P, 58 N,<br>4 n.d.<br>average log: -3.08 |                |
|                          |               | SP                                      | 257 P, 5 N<br>average log: -3.25      | 70 P, 2 n.d.<br>average log: -3.78          | 110 P, 2 n.d.<br>average log: -<br>4.25          | 206 P, 4 n.d.<br>average log: -3.99          |                |
|                          |               | SD                                      | 2 P, 50 N<br>average log: -0.07       | 2 P, 23 N<br>average log: -0.08             | 2 P, 18 N<br>average log: -<br>0.30              | 4 P, 58 N<br>average log: -0.05              |                |
|                          | IgM           | All                                     | 285 P, 22 N, 6<br>n.d.                | 71 P. 23 N,<br>3 n.d.                       | 116 P, 11 N,<br>5 n.d.                           | 195 P, 66 N, 11 n.d.                         |                |
|                          |               | SP                                      | 246 P, 12 N, 3<br>n.d.                | 59 P, 10 N, 3 n.d.                          | 104 P, 4 N, 4 n.d.                               | 189 P, 24 N, 10 n.d.                         |                |
|                          |               | SD                                      | 39 P, 10 N, 3 n.d.                    | 12 P, 13N                                   | 12 P, 7 N, 1 n.d.                                | 6 P, 42 N, 1 n.d.                            |                |
|                          | IgG           | All                                     | 301 P, 5 N,<br>8 n.d.                 | 85 P, 9 N,<br>3 n.d.                        | 116 P, 4 N,<br>12 n.d.                           | 245 P, 15 N, 12 n.d.                         |                |
|                          |               | SP                                      | 256 P, 2 N, 4 n.d.                    | 69 P, 3 n.d.                                | 104 P, 8 n.d.                                    | 197 P, 2 N, 11 n.d.                          |                |
|                          |               | SD                                      | 45 P, 3 N, 4 n.d.                     | 16 P, 9 N                                   | 12 P, 4 N, 4 n.d.                                | 48 P, 13 N, 1 n.d.                           |                |
| <b>Syphilis stage</b>    | primary       | All                                     | 203                                   | 41                                          | 52                                               | 62                                           |                |
|                          |               | SP                                      | 166                                   | 31                                          | 40                                               | 55                                           |                |
|                          |               | SD                                      | 37                                    | 10                                          | 12                                               | 7                                            |                |
|                          | secondary     | All                                     | 42                                    | 13                                          | 39                                               | 57                                           |                |
|                          |               | SP                                      | 41                                    | 13                                          | 39                                               | 55                                           |                |
|                          |               | SD                                      | 1                                     | 0                                           | 0                                                | 2                                            |                |
|                          | others        | All                                     | 69                                    | 43                                          | 41                                               | 153                                          |                |

---

|    |    |    |    |     |
|----|----|----|----|-----|
| SP | 50 | 28 | 33 | 100 |
| SD | 19 | 15 | 8  | 53  |

---

SP – seropositive, SD - serodiscrepant

P – positive, N – negative, n.d. – not determined

\* one woman in age of 51

\*\* unknown sex: 1 (0.4%)

\*\*\* unknown sex: 1 (0.4%)
